# Supplementary material for: Evaluating exercise therapies in adolescent idiopathic scoliosis: a systematic review with Bayesian network meta-analysis
Source: PeerJ journal article supplement (doi:10.7717/peerj.19175), 2025-03-31
Supplement: Author's_revised_response..docx [file Author%27s_revised_response..docx]

Dear Editor and Reviewers,

We sincerely appreciate the opportunity to revise our manuscript and are grateful for the positive and constructive feedback provided by the reviewers. Regarding the addition of Qigang Chen and Pengcheng Li as co-authors, we would like to explain that, during the initial drafting of the manuscript, the statistical analysis for Covariate analysis had not been performed. After receiving the reviewers' comments, we realized that in order to address the shortcomings and improve the manuscript, it was essential to conduct Covariate analysis. The specific contributions of these two authors are as follows:

1. Qigang Chen: The statistical methods for Covariate analysis are relatively complex. Qigang Chen primarily guided the first author, Yang Jiang, in completing this section of the analysis and also thoroughly reviewed the entire manuscript to ensure methodological rigor and scientific accuracy.
2. Pengcheng Li: Based on the reviewer’s suggestion, the relevant included literature needed to be re-examined. With years of clinical experience in AIS treatment, Pengcheng Li provided valuable guidance to the first author, Yang Jiang, in reviewing the included studies and minimizing heterogeneity between the studies, as much as possible.

In light of these contributions, we believe that both Qigang Chen and Pengcheng Li have made substantial and invaluable contributions to the paper, and their inclusion as co-authors is warranted. We respectfully request the editor and reviewers' approval for their authorship. Once again, we sincerely thank you for your guidance and support.
