# Supplementary material for: Evaluating exercise therapies in adolescent idiopathic scoliosis: a systematic review with Bayesian network meta-analysis
Source: PeerJ journal article supplement (doi:10.7717/peerj.19175), 2025-03-31
Supplement: Rationale.docx [file Rationale.docx]

**Rationale for the Study and Its Contributions**

**Background and Rationale**

Adolescent Idiopathic Scoliosis (AIS) is a complex three-dimensional spinal deformity that affects adolescents during their growth and development. It is characterized by an asymmetric curvature and rotational deformity of the spine, with a Cobb angle of ≥10° on a standing full-spine X-ray. AIS predominantly affects individuals between the ages of 10 and 16, with an incidence rate of 2%-12%, and is more prevalent in females. The exact pathogenesis of AIS remains poorly understood, and it is believed to arise from a complex interplay of multiple factors, including genetic predisposition, spinal biomechanics, neurology, hormonal regulation, biochemistry, environmental influences, and behavioral changes. This condition can lead to complications such as back pain, respiratory issues, disability, and mental health problems, significantly impairing the quality of life of affected adolescents.

Exercise therapy has gained considerable traction as a financially prudent and readily applicable intervention for AIS. It offers numerous advantages over traditional treatments, such as affordability, negligible side effects, improved aesthetic perception, and an overall enhancement in quality of life. However, despite the growing interest in exercise therapies, a definitive agreement on the superiority of one method over another remains elusive. This study aims to fill this research gap by systematically reviewing and comparing the effectiveness of various exercise therapies for AIS using a Bayesian network meta-analysis.

**Contributions of the Study**

Comprehensive Evaluation of Exercise Therapies: This study provides a comprehensive evaluation of the effects of different exercise therapies on Cobb angle, axial trunk rotation (ATR), and SRS-22 scores in patients with AIS. By including 23 studies with 1,289 participants, this is the most extensive and rigorous analysis to date, offering robust evidence-based recommendations for the management of AIS.

Identification of Optimal Therapeutic Strategies: The study identifies the integration of the Schroth method with core stabilization training (Schroth + Core) as the optimal strategy for addressing AIS. This combination demonstrates significantly enhanced effectiveness in reducing Cobb angle, ATR, and improving quality of life, as evidenced by the SRS-22 scores. These findings provide clear guidance for clinicians and therapists in selecting the most effective exercise therapies for their patients.

Advanced Statistical Analysis: The use of Bayesian network meta-analysis allows for a more nuanced comparison of multiple interventions simultaneously. This advanced statistical method provides a comprehensive ranking of different exercise therapies, offering insights into their relative effectiveness and facilitating informed decision-making in clinical practice.

Covariate Analysis: The study conducts a covariate analysis to explore factors that may influence the effectiveness of exercise therapies, such as age and baseline Cobb angle. The findings suggest that younger patients and those with smaller baseline Cobb angles may benefit more from specific exercise interventions, highlighting the importance of early intervention and tailored treatment plans.

Low Heterogeneity and No Publication Bias: The study demonstrates low heterogeneity and no publication bias, indicating that the results are reliable and generalizable. This strengthens the credibility of the findings and supports the implementation of the recommended exercise therapies in clinical settings.

Implications for Future Research: The study highlights the need for more rigorous and comprehensive studies to further validate the findings and explore the long-term effects of different exercise therapies. It also suggests the potential for investigating the efficacy of exercise interventions in combination with brace-wearing and the influence of skeletal maturity on treatment outcomes.

In conclusion, this study provides valuable insights into the effectiveness of various exercise therapies for AIS, with a particular emphasis on the integration of the Schroth method with core stabilization training. The findings offer a strong foundation for future research and clinical practice, ultimately contributing to improved outcomes for adolescents with idiopathic scoliosis.
